# Supplementary material for: Associations between the Home Physical Environment and Children’s Home-Based Physical Activity and Sitting
Source: MDPI journal article supplement (doi:10.3390/ijerph16214178), 2019-10-29
Supplement: s1 [file s1]

| <b>Description of Independent variables</b>                                          |                                                                                                                                                                  |                                                                                                                                                                                                                                                                                                                                                                                                                                                                                                                                                                                                                                                                                                                                                                                                                                                                                                                                                                                                                                                                                                                                                      |
|--------------------------------------------------------------------------------------|------------------------------------------------------------------------------------------------------------------------------------------------------------------|------------------------------------------------------------------------------------------------------------------------------------------------------------------------------------------------------------------------------------------------------------------------------------------------------------------------------------------------------------------------------------------------------------------------------------------------------------------------------------------------------------------------------------------------------------------------------------------------------------------------------------------------------------------------------------------------------------------------------------------------------------------------------------------------------------------------------------------------------------------------------------------------------------------------------------------------------------------------------------------------------------------------------------------------------------------------------------------------------------------------------------------------------|
| <b><i>Audit variables</i></b>                                                        | <b><i>Calculation</i></b>                                                                                                                                        | <b><i>Items</i></b>                                                                                                                                                                                                                                                                                                                                                                                                                                                                                                                                                                                                                                                                                                                                                                                                                                                                                                                                                                                                                                                                                                                                  |
| <b>Physical activity (PA) equipment accessibility and availability summary score</b> | Each PA item was multiplied by its accessibility rating (A=1, B=2, C=3, D=4). The PA equipment values for the home were then summed.                             | <b>Sports equipment</b> <ol style="list-style-type: none"> <li>1. Balls (e.g., football, rugby, basketball)</li> <li>2. Bats/Racquets (e.g., cricket, softball, tennis)</li> <li>3. Frisbee</li> <li>4. Skipping rope</li> <li>5. Hula hoop</li> </ol> <b>Transportation equipment</b> <ol style="list-style-type: none"> <li>6. Bicycle</li> <li>7. Scooter/skateboard/ripstick/skates</li> </ol> <b>Fitness equipment</b> <ol style="list-style-type: none"> <li>8. Stationary (aerobic) exercise equipment (e.g., treadmill, exercise bike, punch bag)</li> <li>9. Weights/toning equipment</li> </ol> <b>Outdoor play equipment</b> <ol style="list-style-type: none"> <li>10. Basketball ring</li> <li>11. Fixed play structure (e.g., swings, slide, climbing, sandpit)</li> <li>12. Cubby/Tree house</li> <li>13. Trampoline</li> <li>14. Pool (in ground or above)</li> <li>15. Football goal net</li> <li>16. Swing ball</li> <li>17. Badminton/Volleyball net</li> </ol> <b>Indoor play equipment</b> <ol style="list-style-type: none"> <li>18. Pool/snooker table</li> <li>19. Table tennis table</li> <li>20. Table football</li> </ol> |
| <b>Musical instrument accessibility and availability summary score</b>               | Each musical instrument item was multiplied by its accessibility rating (A=1, B=2, C=3, D=4). The musical instrument values for the home were then summed.       | <ol style="list-style-type: none"> <li>21. Piano/ keyboard</li> <li>22. Drums</li> <li>23. Other instruments (e.g., guitar, trumpet, violin, flute)</li> </ol>                                                                                                                                                                                                                                                                                                                                                                                                                                                                                                                                                                                                                                                                                                                                                                                                                                                                                                                                                                                       |
| <b>Overall media equipment accessibility and availability summary score</b>          | Each media equipment item in the home was multiplied by its accessibility rating (A=1, B=2, C=3, D=4). The media equipment values for the home were then summed. | <b>Fixed</b> <ol style="list-style-type: none"> <li>24. Television</li> <li>25. VCR/DVD/Blue-ray player</li> <li>26. Pay TV (e.g., Sky)</li> <li>27. TV on demand (e.g., Apple TV)</li> <li>28. Desktop computer</li> <li>29. Video game system (attached to TV) (e.g., Xbox, Wii, PlayStation)</li> </ol>                                                                                                                                                                                                                                                                                                                                                                                                                                                                                                                                                                                                                                                                                                                                                                                                                                           |

|                                                                             |                                                                                                                                                                                               |                                                                                                                                                                                                                                                                                                |
|-----------------------------------------------------------------------------|-----------------------------------------------------------------------------------------------------------------------------------------------------------------------------------------------|------------------------------------------------------------------------------------------------------------------------------------------------------------------------------------------------------------------------------------------------------------------------------------------------|
| <b>Bedroom media equipment accessibility and availability summary score</b> | Each media equipment item in the primary child's bedroom was multiplied by its accessibility rating (A=1, B=2, C=3, D=4). The media equipment values in the child's bedroom were then summed. | 30. <b>ACTIVE</b> video game system (e.g., Wii Fit, Xbox Kinect, PlayStation Move)<br><b>Portable</b><br>31. Handheld video game player (e.g., Nintendo DS, Sony PSP)<br>32. Laptop computer<br>33. Tablet computer (e.g., iPad, Samsung Galaxy)<br>34. Ipad Touch/ Galaxy Player (or similar) |
| <b>Seated furniture accessibility and availability summary score</b>        | Each seated furniture item was multiplied by its accessibility rating (A=1, B=2, C=3, D=4). The seated furniture item values for the home were then summed.                                   | 35. Sofa (2+ seater)<br>36. Lounge chair (single seater)<br>37. Coffee table<br>38. Dining/kitchen chair<br>39. Dining/kitchen table<br>40. Office chair<br>41. Desk                                                                                                                           |
| <b>Number of living areas with a TV</b>                                     | Total number of living areas in the home with a TV                                                                                                                                            | <b>Living areas</b><br>Open plan living area<br>Lounge<br>Office<br>Other room                                                                                                                                                                                                                 |
| <b>Presence of a TV in the child's bedroom</b>                              | Whether there was a TV located in the primary child's bedroom                                                                                                                                 | Yes/no                                                                                                                                                                                                                                                                                         |
| <b>Presence of an open plan living area in the home</b>                     | Whether there was an open plan living area present                                                                                                                                            | Yes/no                                                                                                                                                                                                                                                                                         |
| <b>Audit questions</b>                                                      | <b>Individual items</b>                                                                                                                                                                       | <b>Item categories</b>                                                                                                                                                                                                                                                                         |
| <b>Home features</b>                                                        | Type of home                                                                                                                                                                                  | Detached house; Semi-detached; Terrace house; Bungalow; Flat/unit/apartment (5)                                                                                                                                                                                                                |
|                                                                             | Number of floors                                                                                                                                                                              | One; Two; More than two (3)                                                                                                                                                                                                                                                                    |
|                                                                             | House size                                                                                                                                                                                    | Small; Medium; Large (3)                                                                                                                                                                                                                                                                       |
|                                                                             | Garden size                                                                                                                                                                                   | Small; Medium; Large; No garden (4)                                                                                                                                                                                                                                                            |
| <b>Electronic media</b>                                                     | Type of TV service                                                                                                                                                                            | Freeview; Digital TV (e.g., SKY, Virgin Media, TalkTalk, BT etc...); Other (3)                                                                                                                                                                                                                 |
|                                                                             | Subscription to a movie/TV streaming service? (e.g., Netflix, Now TV, Amazon Video, Kodi etc...)                                                                                              | Yes; No (2)                                                                                                                                                                                                                                                                                    |
|                                                                             | Number of smartphones                                                                                                                                                                         | 0; 1-2;3-4;5-6;7-8;>8 (6)                                                                                                                                                                                                                                                                      |
| <b>Space to play</b>                                                        | There is enough space to play...:<br>... in the front garden<br>... in the back garden                                                                                                        | Strongly disagree; disagree; agree; strongly agree; (N/A) (5)                                                                                                                                                                                                                                  |

|  |                      |  |
|--|----------------------|--|
|  | ... inside the house |  |
|--|----------------------|--|

PA: Physical activity
